# Supplementary material
Source: Springer Nature journal article supplement (https://www.springerprofessional.de/resource/supplementary/13673_2011_13_MOESM8_ESM.pdf/11899344)
Supplement: MOESM8 [file 11899344]

| <b>Sl. No.</b> | <b>Simulation Parameters</b>             | <b>Values</b>          |
|----------------|------------------------------------------|------------------------|
| 1              | Number of Clusters                       | 5 to 50                |
| 2              | Mobility                                 | 0 to 100 m/s           |
| 3              | Mobility model                           | Random way point model |
| 4              | Number of service providers per cluster  | 2 to 20                |
| 5              | Number of services in a service provider | 2 to 25                |
| 6              | Simulation Time                          | 0 – 1000 sec           |
| 7              | Number of Users                          | 1 to 1000              |
| 8              | Number of criteria                       | 2 to 10                |
| 9              | Percentage of faulty Service Provider    | 1 % to 50%             |
| 10             | Service Provider Load                    | 1% (min) to 50% (max)  |

Table 1
